# Supplementary material for: Time-resolved amino acid uptake of Clostridium difficile 630Δerm and concomitant fermentation product and toxin formation
Source: PubMed Central journal article supplement (PMC4683695; doi:10.1186/s12866-015-0614-2), 2015-12-18
Supplement: 12866_2015_614_MOESM1_ESM.pdf [file 12866_2015_614_MOESM1_ESM.pdf]

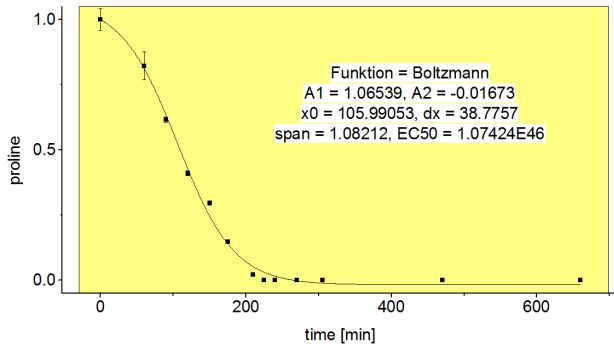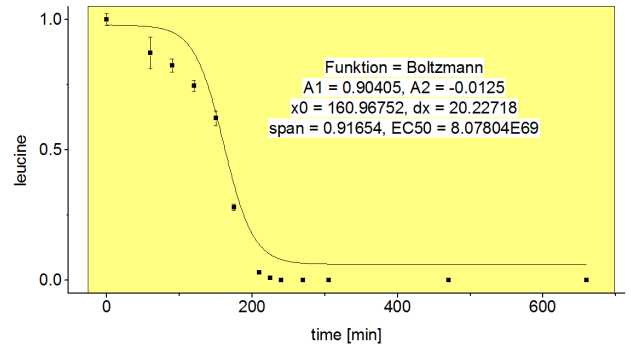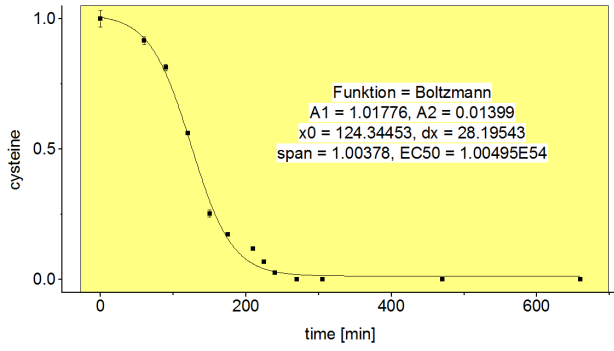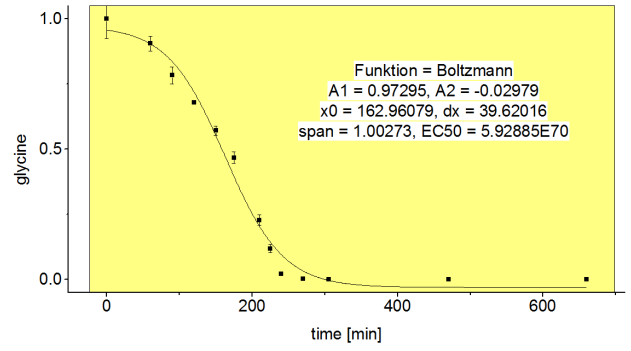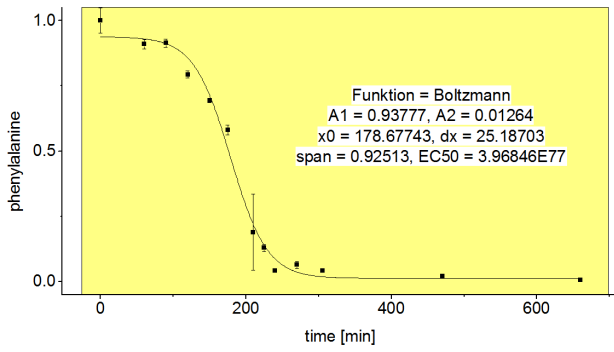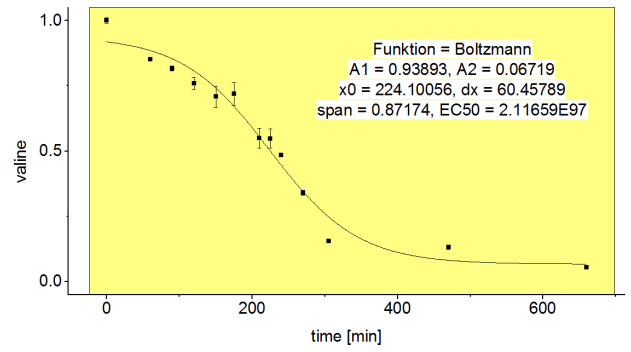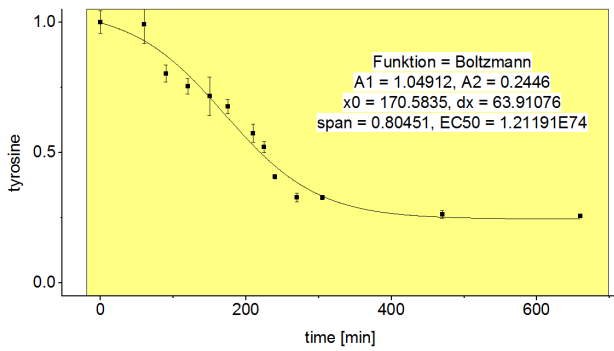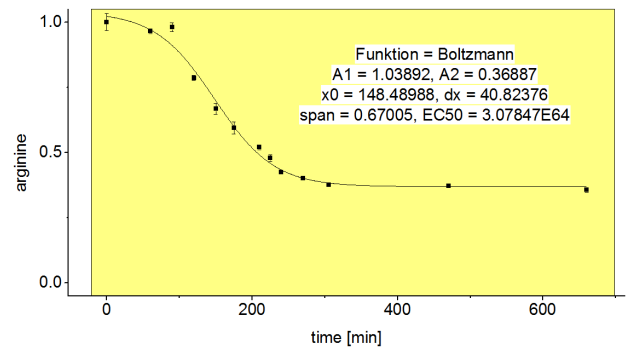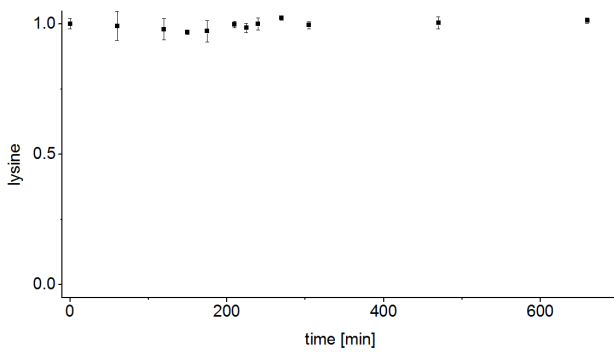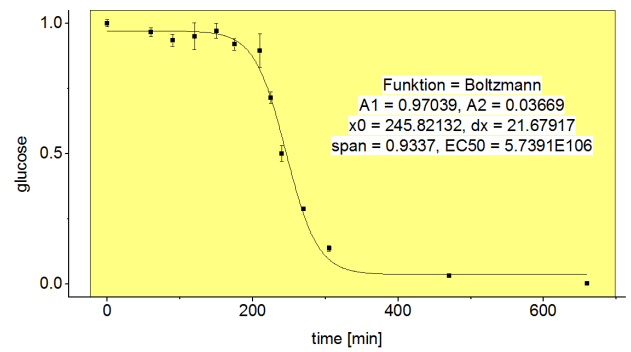

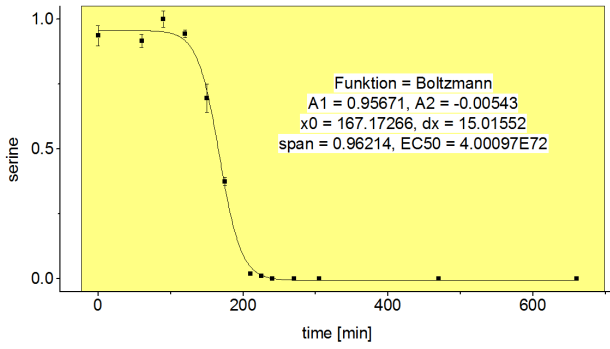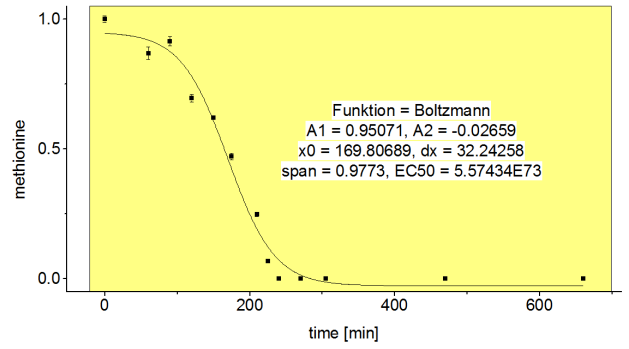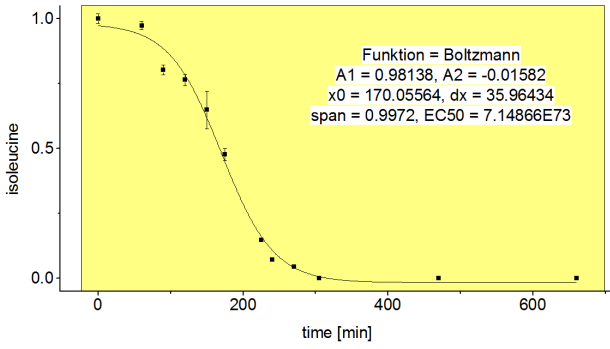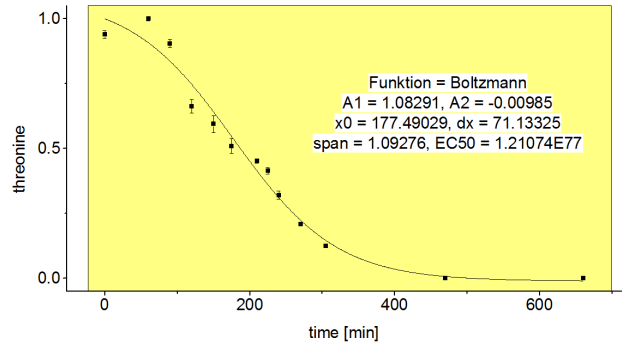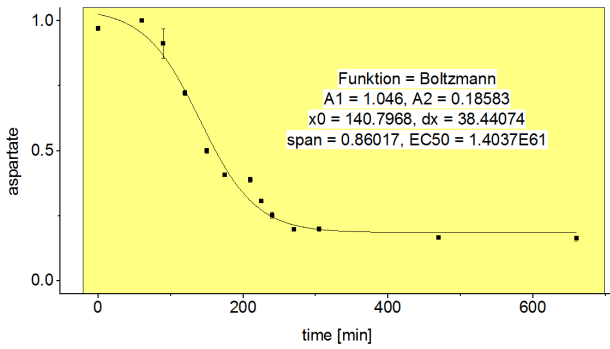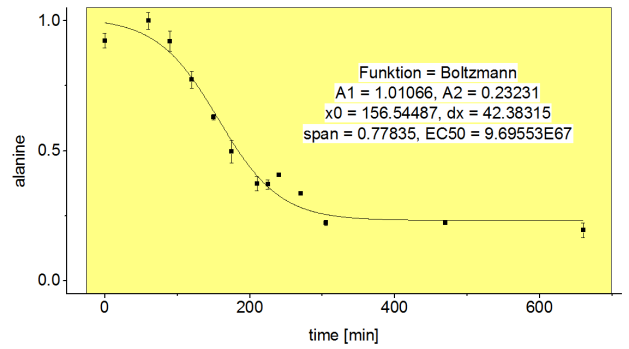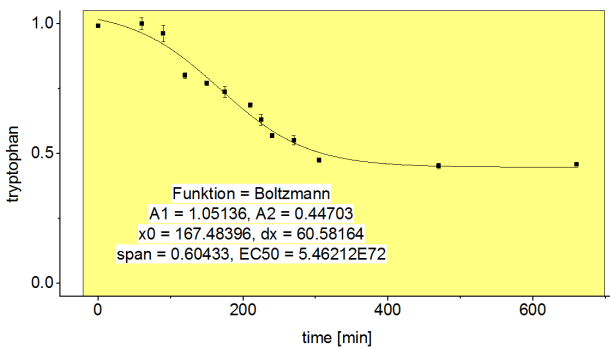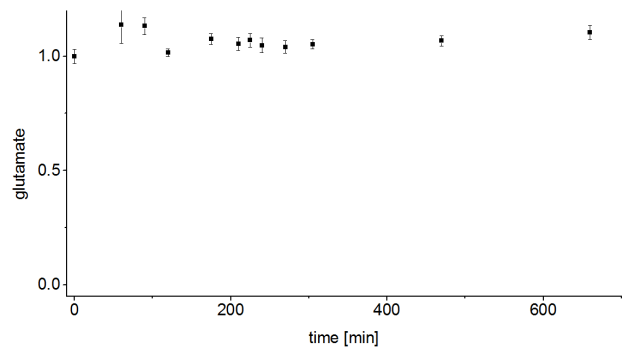

Additional file 1: Substrate consumption in CDMM.  
 Plotted were relative abundances based on peak areas (except glucose) were obtained by GC-MS or concentrations obtained by enzymatic assays (glucose) and fitted using OriginPro 9.0G software.
