# Supplementary material for: Time-resolved amino acid uptake of Clostridium difficile 630Δerm and concomitant fermentation product and toxin formation
Source: PubMed Central journal article supplement (PMC4683695; doi:10.1186/s12866-015-0614-2), 2015-12-18
Supplement: 12866_2015_614_MOESM3_ESM.pdf [file 12866_2015_614_MOESM3_ESM.pdf]

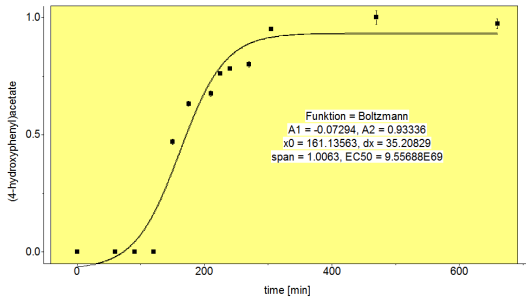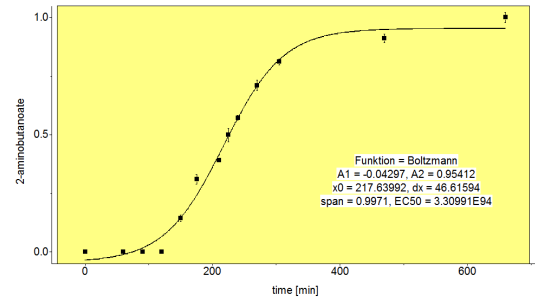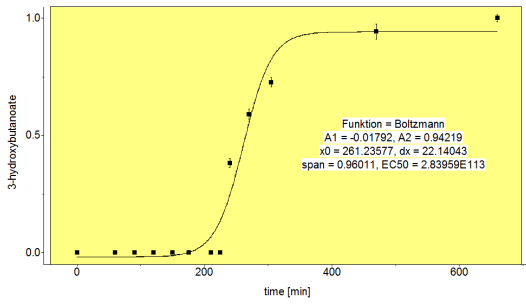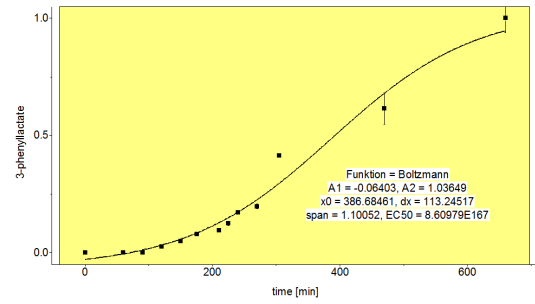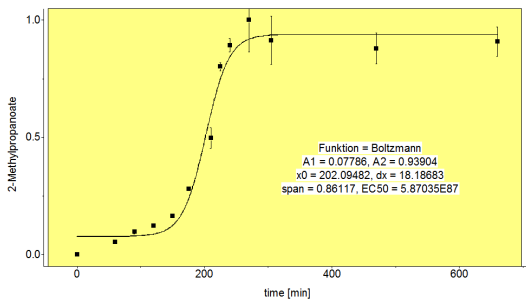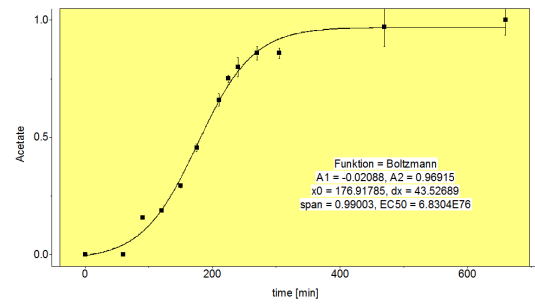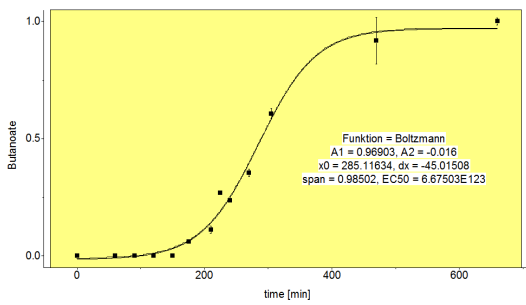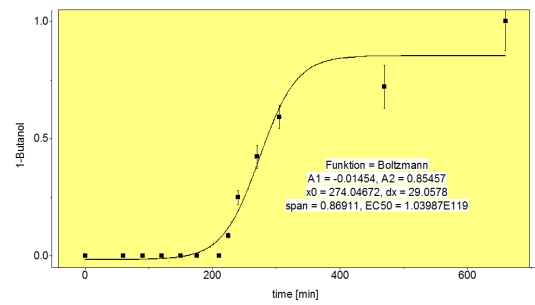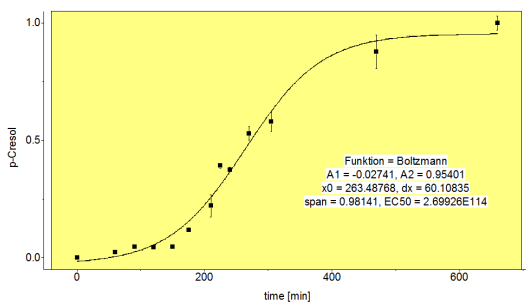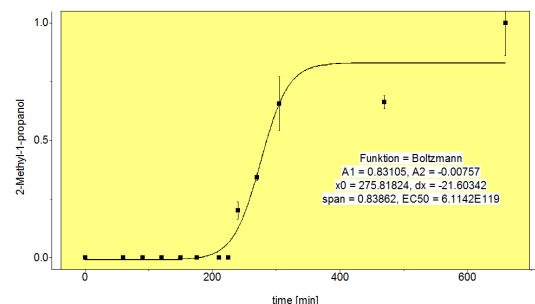

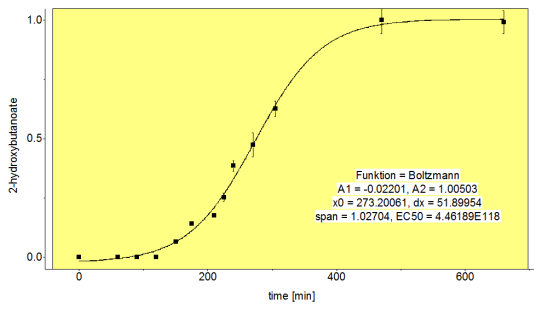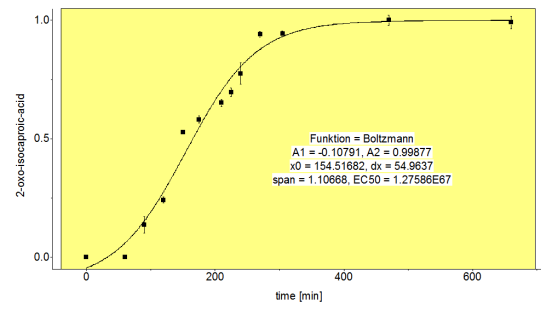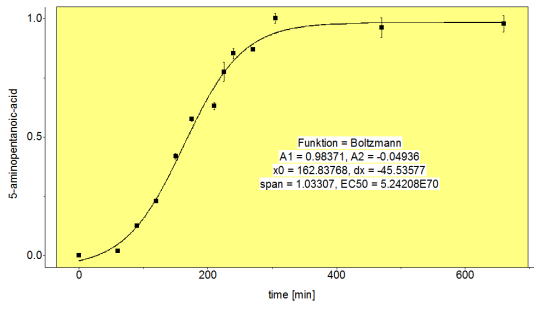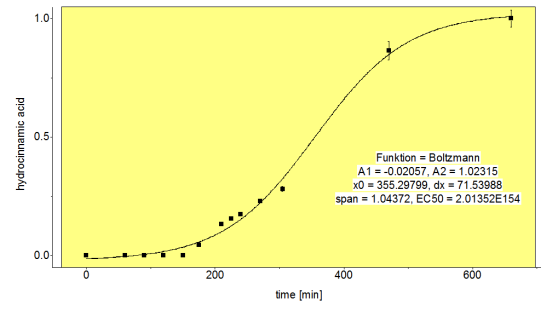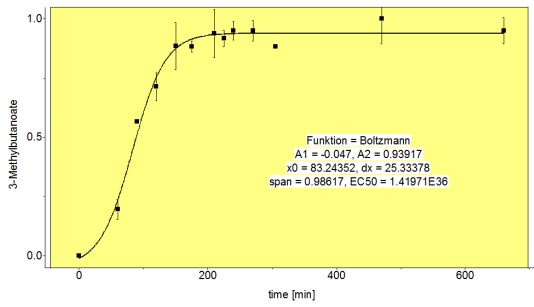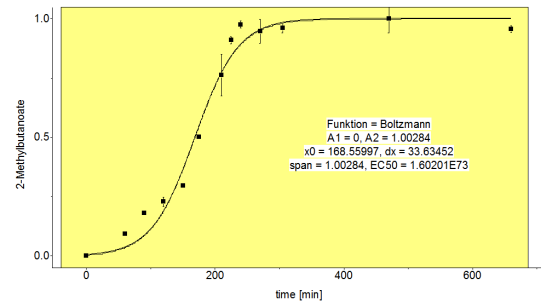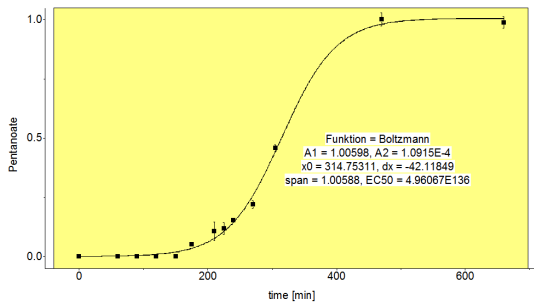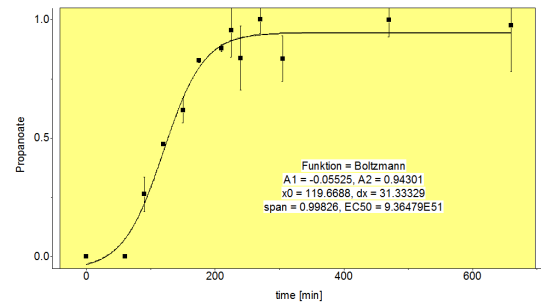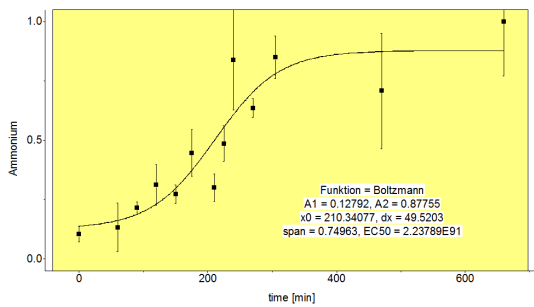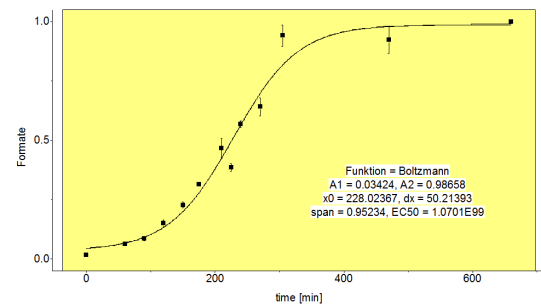

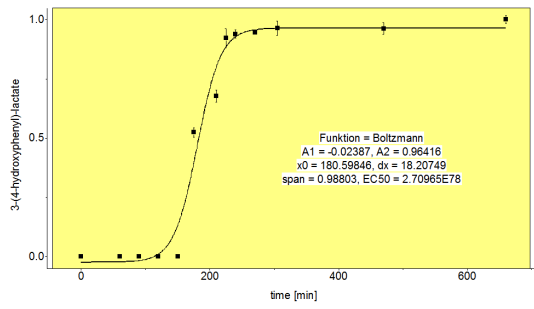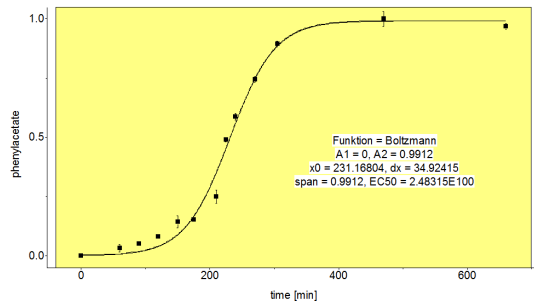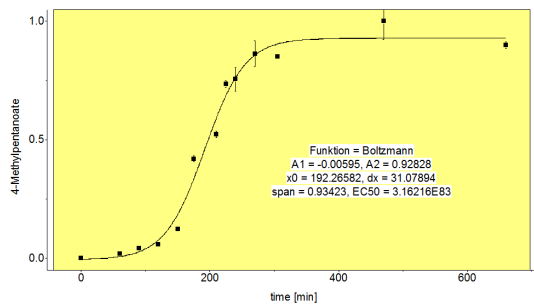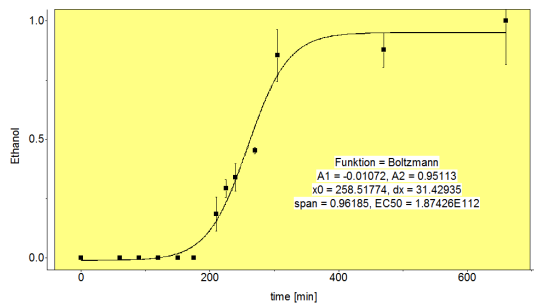

Additional file 3: Product formation in CDMM. Plotted were relative abundances based on peak areas (except formate and ammonium) were obtained by GC-MS or concentrations obtained by enzymatic assays (formate and ammonium) and fitted using OriginPro 9.0G software.
