# Supplementary material for: Time-resolved amino acid uptake of Clostridium difficile 630Δerm and concomitant fermentation product and toxin formation
Source: PubMed Central journal article supplement (PMC4683695; doi:10.1186/s12866-015-0614-2), 2015-12-18
Supplement: 12866_2015_614_MOESM4_ESM.pdf [file 12866_2015_614_MOESM4_ESM.pdf]

Additional file 4: **Casein composition and deduced amino acid composition of casamino acids.**

Data were confirmed by enzymatic measurements of alanine, glutamate and free amino acid contents.

| amino acid (aa) | number of amino acids (protein sequence) |              |         |          |     | aa/aa <sub>total</sub> |    |        | aa/casein | aa/alanine |
|-----------------|------------------------------------------|--------------|---------|----------|-----|------------------------|----|--------|-----------|------------|
|                 | casein subunit (bovine)                  |              |         |          | SUM | casein                 |    | g/mol  |           |            |
|                 | $\alpha$ -S1                             | $\alpha$ -S2 | $\beta$ | $\kappa$ |     | %                      | %  |        | %         |            |
| alanine         | 12                                       | 11           | 9       | 16       | 48  | 6                      | 6  | 5.03   | 4         | 100        |
| arginine        | 6                                        | 6            | 4       | 5        | 21  | 2                      | 2  | 4.30   | 3         | 86         |
| asparagine      | 8                                        | 14           | 5       | 8        | 35  | 4                      | 0  | 0.00   | -         | -          |
| aspartate       | 7                                        | 4            | 4       | 4        | 19  | 2                      | 6  | 8.46   | 7         | 168        |
| cysteine        | 1                                        | 3            | 1       | 2        | 7   | 1                      | 0  | 0.00   | -         | -          |
| glutamate       | 25                                       | 24           | 19      | 12       | 80  | 9                      | 17 | 25.10  | 19        | 499        |
| glutamine       | 14                                       | 16           | 20      | 15       | 65  | 8                      | 0  | 0.00   | -         | -          |
| glycine         | 9                                        | 2            | 5       | 3        | 19  | 2                      | 2  | 1.68   | 1         | 33         |
| histidine       | 5                                        | 3            | 5       | 3        | 16  | 2                      | 2  | 2.92   | 2         | 58         |
| isoleucine      | 12                                       | 12           | 11      | 13       | 48  | 6                      | 6  | 7.41   | 6         | 147        |
| leucine         | 22                                       | 16           | 27      | 13       | 78  | 9                      | 9  | 12.04  | 9         | 239        |
| lysine          | 15                                       | 25           | 12      | 10       | 62  | 7                      | 7  | 10.66  | 8         | 212        |
| methionine      | 6                                        | 5            | 7       | 4        | 22  | 3                      | 3  | 3.86   | 3         | 77         |
| phenylalanine   | 8                                        | 9            | 9       | 7        | 33  | 4                      | 4  | 6.41   | 5         | 127        |
| proline         | 17                                       | 10           | 35      | 21       | 83  | 10                     | 10 | 11.24  | 9         | 223        |
| serine          | 16                                       | 17           | 16      | 14       | 63  | 7                      | 7  | 7.79   | 6         | 155        |
| threonine       | 6                                        | 16           | 9       | 17       | 48  | 6                      | 6  | 6.73   | 5         | 134        |
| tryptophan      | 2                                        | 2            | 1       | 1        | 6   | 1                      | 0  | 0.00   | -         | -          |
| tyrosine        | 10                                       | 12           | 4       | 9        | 35  | 4                      | 4  | 7.46   | 6         | 148        |
| valine          | 13                                       | 15           | 21      | 13       | 62  | 7                      | 7  | 8.55   | 7         | 170        |
| SUM             | 214                                      | 222          | 224     | 190      | 850 | 100                    | 98 | 129.64 | 100       | 2576       |
